# Supplementary material for: Genetic diversity and population structure of early and extra-early maturing maize germplasm adapted to sub-Saharan Africa
Source: PubMed Central journal article supplement (PMC7888073; doi:10.1186/s12870-021-02829-6), 2021-02-17

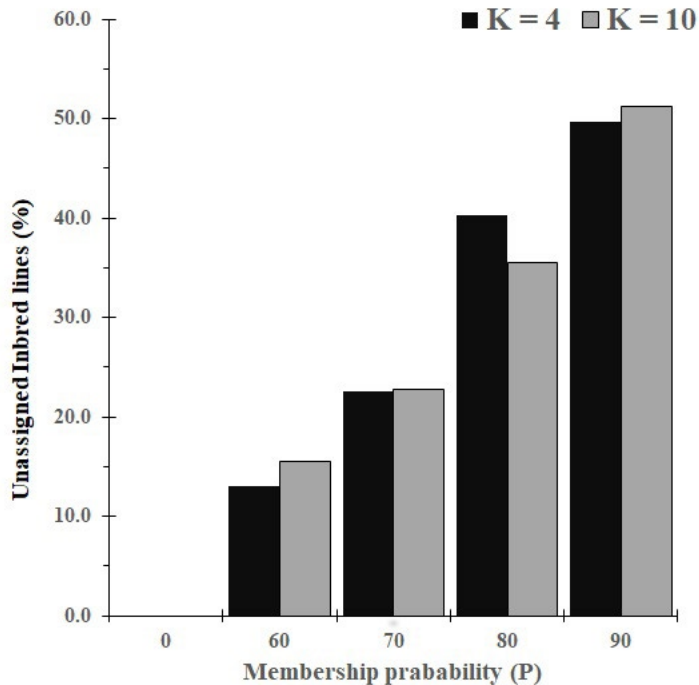

Supplement: 12870_2021_2829_MOESM1_ESM.pdf [file 12870_2021_2829_MOESM1_ESM.pdf]
