# Supplementary material for: Genetic diversity and population structure of early and extra-early maturing maize germplasm adapted to sub-Saharan Africa
Source: PubMed Central journal article supplement (PMC7888073; doi:10.1186/s12870-021-02829-6), 2021-02-17
Supplement: 12870_2021_2829_MOESM7_ESM.pdf [file 12870_2021_2829_MOESM7_ESM.pdf]

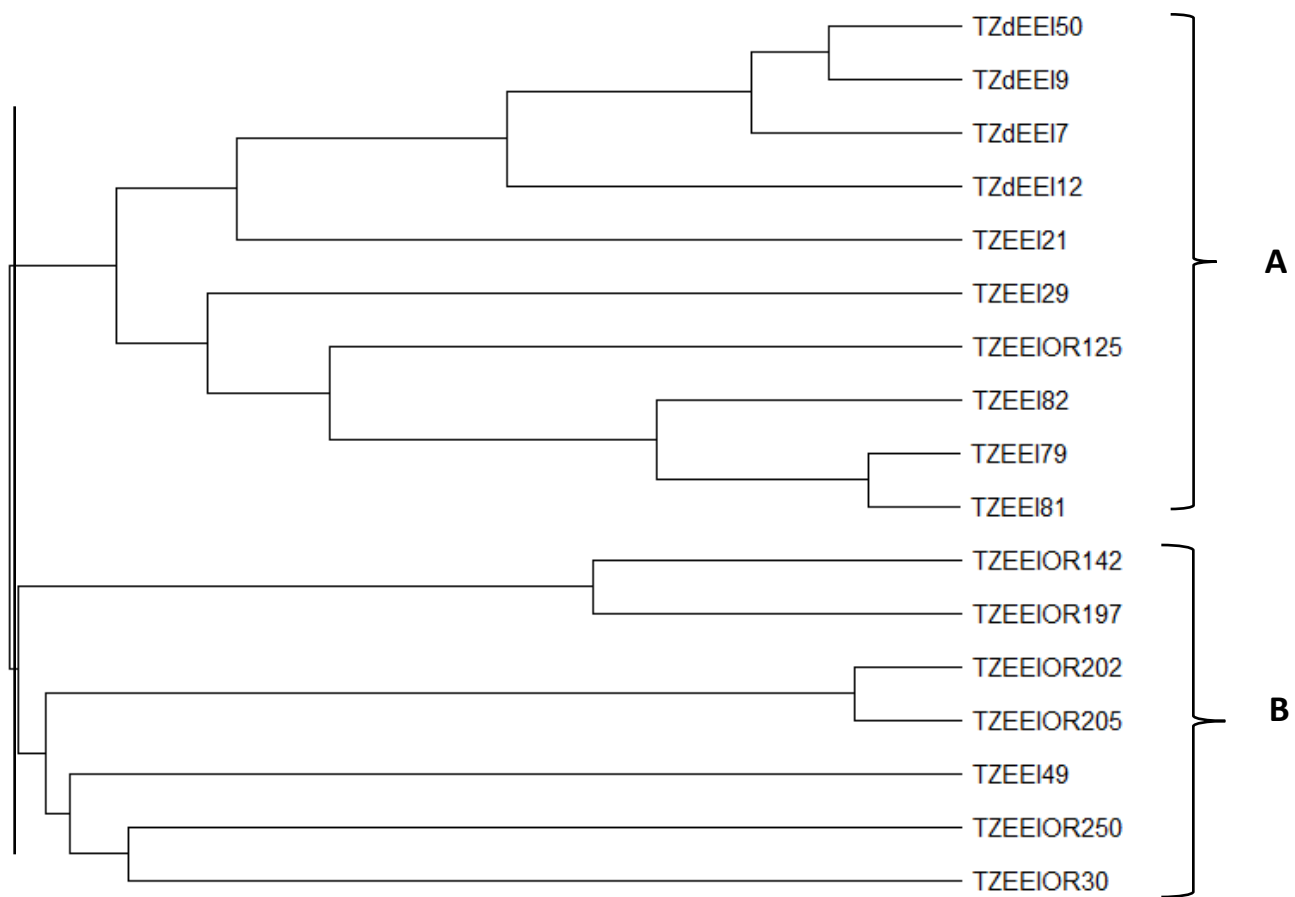

A. Classification of selected extra-early maize inbred lines into heterotic groups A and B using SNP markers.

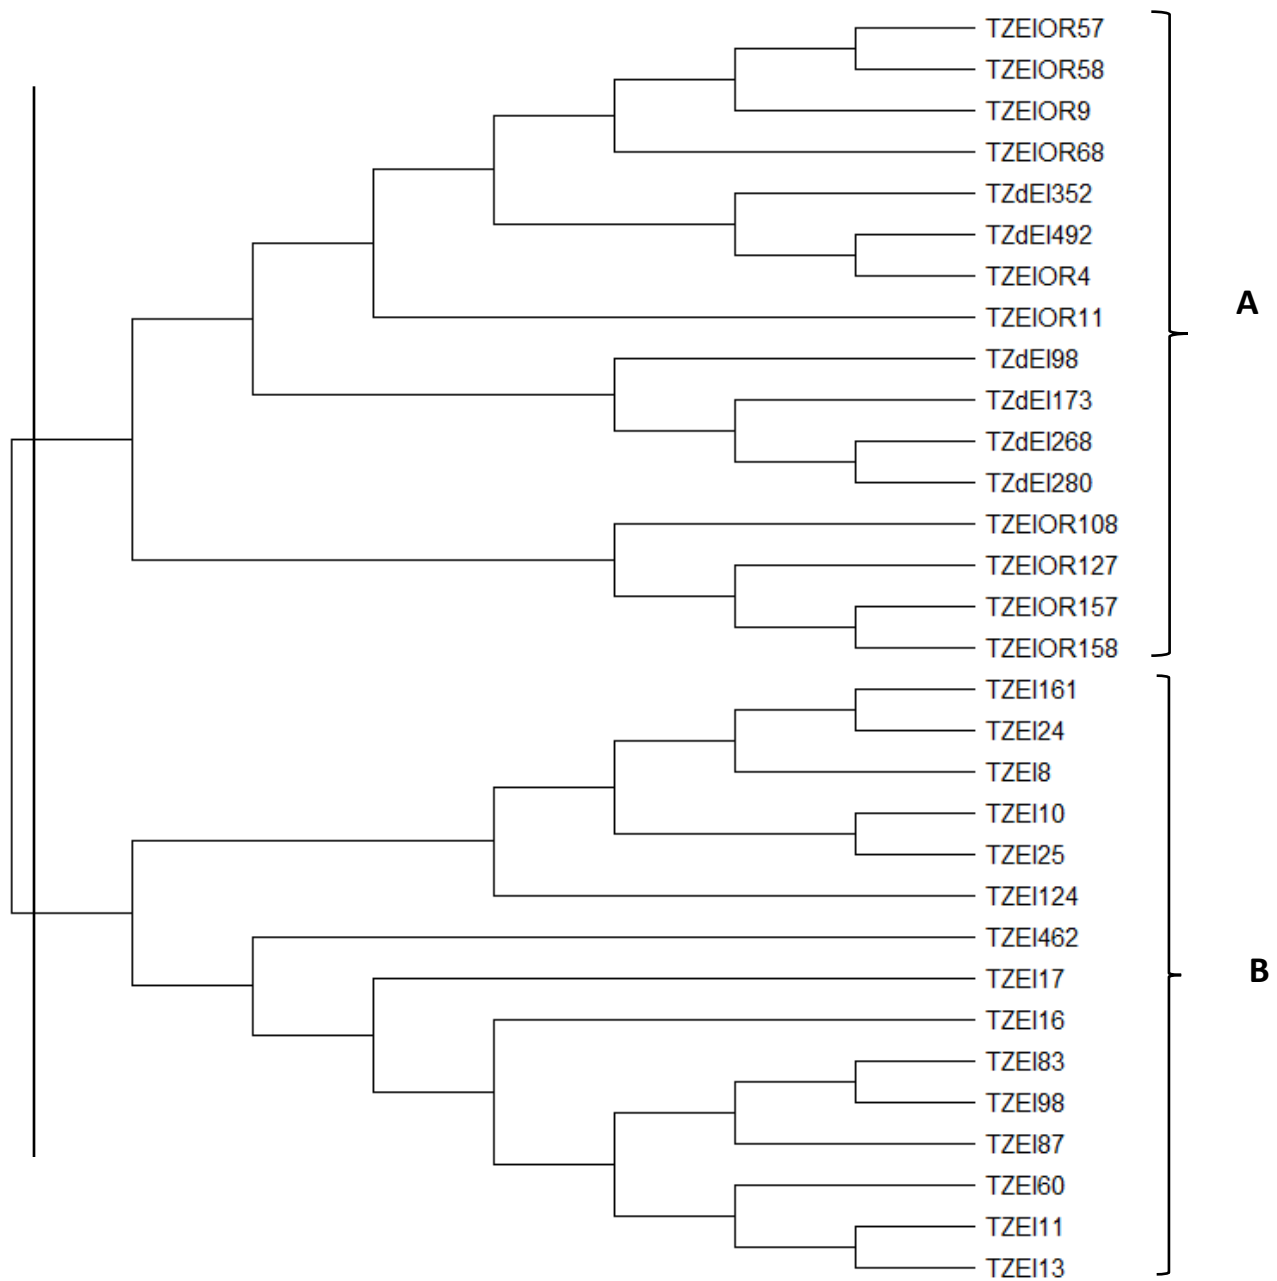

B. Classification of selected early maize inbred lines into heterotic groups A and B using SNP markers.
